# Supplementary material for: Survival Outcomes and Failure Patterns in Patients with Inoperable Non-Metastatic Pancreatic Cancer Treated with Definitive Radiotherapy
Source: MDPI journal article supplement (doi:10.3390/cancers15082213), 2023-04-09
Supplement: s1 [file s1]

Supplementary Figure S1

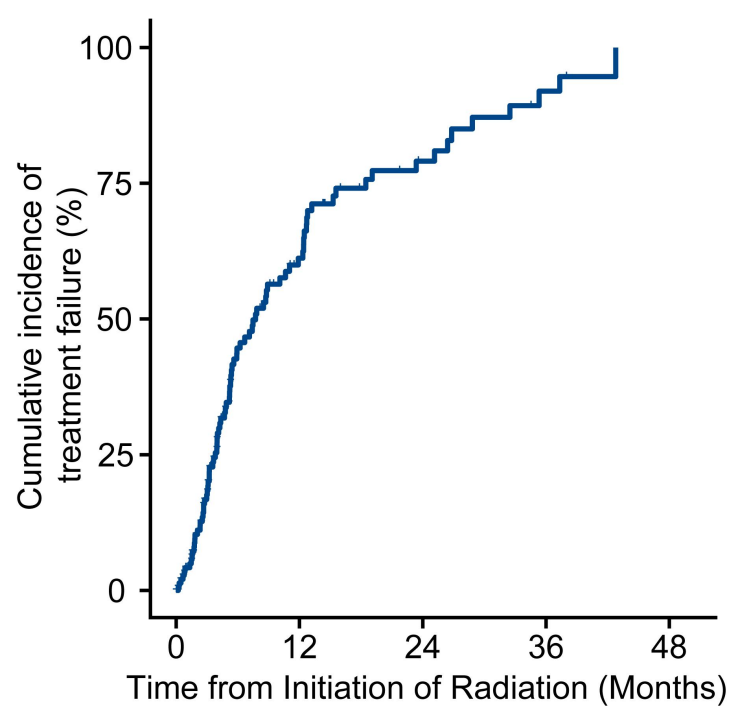

Figure S1: The 1-year and 2-year cumulative incidences of disease progression after RT in entire group.
